# Supplementary material
Source: Royal Society of Chemistry journal article supplement (doi:10.1039/d6ta01999d)
Supplement: d6ta01999d1.pdf [file d6ta01999d1.pdf]

## Support information

### Ultra-Strong, Recyclable, Self-Healable and Transparent Polythiourethane-Urea Elastomer via Physical-Chemical Dual- Reversible Networks Synergy

Yingxia Liang, Lin Li, Xun Lu\*

#### Experimental Section

Feedstock Molar Ratios Detailed molar ratios of all reactants used in the synthesis of PUU and PTUU elastomers are provided in Table S1.

Table S1. Feeding molar ratios of the experimen

|                      | PTMEG2000 | HMDI | ID   | DDM  | PETMP |
|----------------------|-----------|------|------|------|-------|
| PUU-I <sub>9</sub> D | 1         | 2    | 0.9  | 0.1  | 0     |
| PUU-I <sub>2</sub> D | 1         | 2    | 0.67 | 0.33 | 0     |
| PUU-ID               | 1         | 2    | 0.5  | 0.5  | 0     |
| PUU-ID <sub>2</sub>  | 1         | 2    | 0.33 | 0.67 | 0     |
| PUU-ID <sub>9</sub>  | 1         | 2    | 0.1  | 0.9  | 0     |
| PTUU-C <sub>1</sub>  | 1         | 2.1  | 0.67 | 0.33 | 0.05  |
| PTUU-C <sub>2</sub>  | 1         | 2.15 | 0.67 | 0.33 | 0.075 |
| PTUU-C <sub>3</sub>  | 1         | 2.2  | 0.67 | 0.33 | 0.1   |

The decrosslinking mechanism of PTUU using 3 times the mass of PETMP is shown in Fig. S1; the red-marked parts are the thiocarbamate bonds in PTUU polymer chains that participate in an exchange reaction with free thiol groups from PETMP.

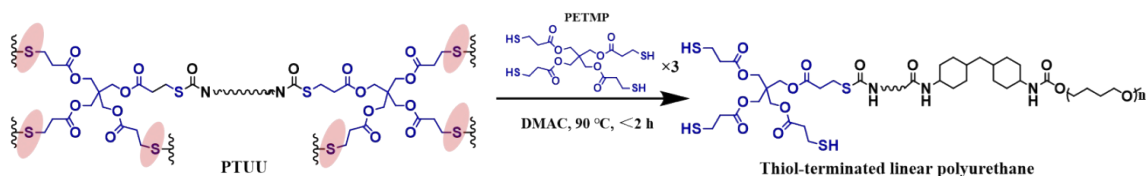

Figure S1. Decrosslinking mechanism of cross-linked elastomer PTUU

Instrumentation and Testing Methods A comprehensive list of instruments and corresponding test

methods is given in Table S2.

Table S2. Laboratory instruments and equipment

| <b>Instrument/Equipment Name</b>                             | <b>Model/Specification</b> | <b>Production/Sales Manufacturer</b>                   |
|--------------------------------------------------------------|----------------------------|--------------------------------------------------------|
| Fourier Transform Infrared Spectrometer                      | VERTEX 70v                 | Bruker, Germany                                        |
| Universal Material Testing Machine                           | AGX-VD                     | Shimadzu, Japan                                        |
| Universal Testing Machine                                    | Instron 5966               | Instron, USA                                           |
| X-ray Diffractometer                                         | XPer Pro MRD               | PANalytical, Netherlands                               |
| Large Sample Scanning Probe Microscope                       | Bruker Icon                | Bruker, Germany                                        |
| UV-Vis Spectrophotometer                                     | UV-2600i                   | Shimadzu, Japan                                        |
| Fluorescence Spectrometer                                    | Fluoromax PLUS R928P       | HORIBA, Japan                                          |
| Steady-State/Transient Fluorescence Spectrometer             | FLS 1000                   | Edinburgh Instruments, UK                              |
| High Precision Crystallographic X-ray Diffractometer         | CS-720                     | Hangzhou Colorful Spectroscopy Technology Co. Ltd.     |
| Microdensitometer                                            | 2010M                      | Mettler Toledo, USA                                    |
| Thermogravimetric Analyzer                                   | TG 209 F3                  | Mettler Toledo, Switzerland                            |
| Dynamic Mechanical Analyzer                                  | DMA-242E                   | Mettler Toledo, Switzerland                            |
| Dynamic Mechanical Thermal Analyzer                          | TA-Q800                    | TA Instruments, USA                                    |
| Small Angle X-ray Scattering                                 | Xenuss 2.0                 | Xenocs, France                                         |
| Thermal Oxidation Chamber                                    | GT7017-BM1                 | High Precision Testing Instruments (Dongguan) Co. Ltd. |
| 600M Superconducting Nuclear Magnetic Resonance Spectrometer | AVANCE III HD 600          | Bruker, Switzerland                                    |

## Results and Discussion

XRD Analysis Wide-angle X-ray diffraction patterns (Fig. S2) confirm the amorphous structure of all elastomers.

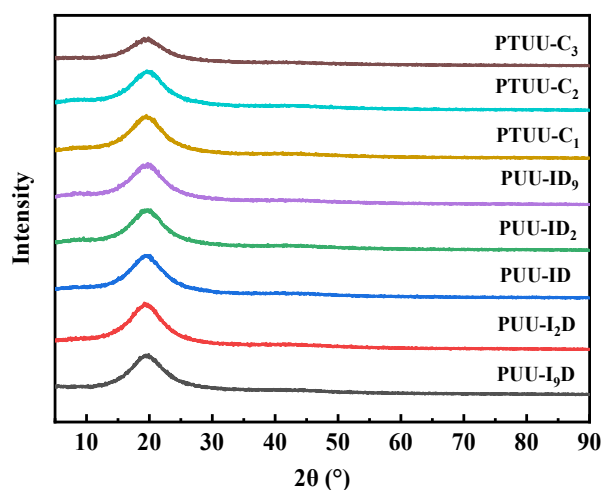

Figure S2. XRD curve of PUU and PTUU elastomers

Swelling Behavior Equilibrium swelling data and gel contents are summarized in Table S3.

Table S3. Swelling properties of PTUU elastomers

|                                | PTUU-<br>C <sub>1</sub> | PTUU-<br>C <sub>2</sub> | PTUU-<br>C <sub>3</sub> |
|--------------------------------|-------------------------|-------------------------|-------------------------|
| <b>Average swelling rate/%</b> | 97                      | 85                      | 87                      |
| <b>Average gel content/%</b>   | 93                      | 94                      | 93                      |

The results of the investigation on  $\pi$ - $\pi$  stacking interactions by UV-Vis absorption spectroscopy and fluorescence emission spectroscopy are shown in Fig. S3.

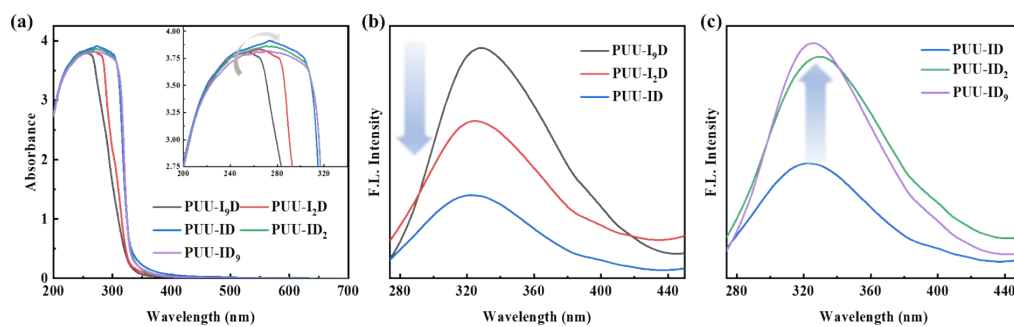

Figure S3. a) UV absorption spectra of PUU elastomers in the wavelength range of 200 ~ 700

nm. b)&c) fluorescence emission spectra of PUU elastomers in the wavelength range of 274 ~ 450 nm.

The curve-fitting results of FTIR spectra in the C=O stretching region for PUU and PTUU elastomers are shown in Fig. S4.

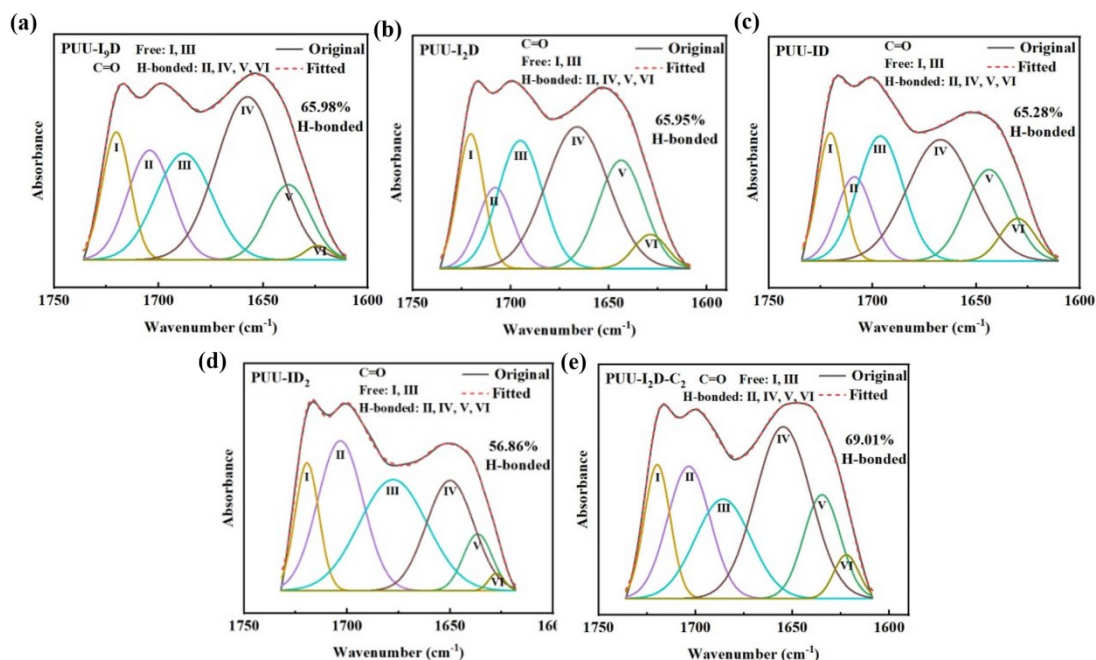

Figure S4 Carbonyl stretching regions of a) PUU-I<sub>9</sub>D, b) PUU-I<sub>2</sub>D, c) PUU-ID, d) PUU-ID<sub>2</sub>, and e) PTUU-C<sub>2</sub>.

Hydrogen-Bonding Analysis Degrees of hydrogen bonding obtained from curve-fitting of the C=O region are listed in Tables S4–S8.

Table S4. The degree of H-bonded of PUU-I<sub>9</sub>D

| PUU-I <sub>9</sub> D |                      | Wavenumber (cm <sup>-1</sup> ) | Area (%) |
|----------------------|----------------------|--------------------------------|----------|
| urethane amide       | Free                 | I(1720)                        | 12.63    |
|                      | H-bonded(ordered)    | II(1704)                       | 17.13    |
| urea amide           | Free                 | III(1687)                      | 21.39    |
|                      | H-bonded(disordered) | IV(1657)                       | 36.07    |
|                      | H-bonded(ordered)    | V(1637)                        | 11.55    |
| amide                | H-bonded(ordered)    | VI(1623)                       | 1.23     |

| PUU-I <sub>9</sub> D            | Wavenumber (cm <sup>-1</sup> ) | Area (%) |
|---------------------------------|--------------------------------|----------|
| <b>Total degree of H-bonded</b> |                                | 65.98    |

Table S5. The degree of H-bonded of PUU-I<sub>2</sub>D

| PUU-I <sub>2</sub> D             | Wavenumber (cm <sup>-1</sup> ) | Area (%)  |       |
|----------------------------------|--------------------------------|-----------|-------|
| <b>v(C=O)<br/>urethane amide</b> | <b>Free</b>                    | I(1720)   | 12.98 |
|                                  | <b>H-bonded(ordered)</b>       | II(1707)  | 10.52 |
| <b>v(C=O)<br/>urea amide</b>     | <b>Free</b>                    | III(1695) | 21.07 |
|                                  | <b>H-bonded(disordered)</b>    | IV(1666)  | 32.84 |
|                                  | <b>H-bonded(ordered)</b>       | V(1643)   | 18.39 |
| <b>v(C=O)<br/>amide</b>          | <b>H-bonded(ordered)</b>       | VI(1628)  | 4.20  |
| <b>Total degree of H-bonded</b>  |                                | 65.95     |       |

Table S6. The degree of H-bonded of PUU-ID

| PUU-ID | Wavenumber (cm <sup>-1</sup> ) | Area (%) |
|--------|--------------------------------|----------|
|--------|--------------------------------|----------|

|                                  |                             |           |       |
|----------------------------------|-----------------------------|-----------|-------|
| <b>v(C=O)<br/>urethane amide</b> | <b>Free</b>                 | I(1720)   | 12.69 |
|                                  | <b>H-bonded(ordered)</b>    | II(1708)  | 11.58 |
| <b>v(C=O)<br/>urea amide</b>     | <b>Free</b>                 | III(1696) | 22.03 |
|                                  | <b>H-bonded(disordered)</b> | IV(1667)  | 31.36 |
|                                  | <b>H-bonded(ordered)</b>    | V(1643)   | 16.63 |
| <b>v(C=O)<br/>amide</b>          | <b>H-bonded(ordered)</b>    | VI(1629)  | 5.71  |
| <b>Total degree of H-bonded</b>  |                             |           | 65.28 |

Table S7. The degree of H-bonded of PUU-ID<sub>2</sub>

| <b>PUU-ID<sub>2</sub></b>        |                             | <b>Wavenumber<br/>(cm<sup>-1</sup>)</b> | <b>Area (%)</b> |
|----------------------------------|-----------------------------|-----------------------------------------|-----------------|
| <b>v(C=O)<br/>urethane amide</b> | <b>Free</b>                 | I(1719)                                 | 12.25           |
|                                  | <b>H-bonded(ordered)</b>    | II(1703)                                | 27.65           |
| <b>v(C=O)<br/>urea amide</b>     | <b>Free</b>                 | III(1677)                               | 30.89           |
|                                  | <b>H-bonded(disordered)</b> | IV(1649)                                | 21.38           |
|                                  | <b>H-bonded(ordered)</b>    | V(1636)                                 | 6.72            |
| <b>v(C=O)<br/>amide</b>          | <b>H-bonded(ordered)</b>    | VI(1627)                                | 1.11            |
| <b>Total degree of H-bonded</b>  |                             |                                         | 56.86           |

Table S8. The degree of H-bonded of PTUU-C<sub>2</sub>

| <b>PTUU-C<sub>2</sub></b> |  | <b>Wavenumber (cm<sup>-1</sup>)</b> | <b>Area (%)</b> |
|---------------------------|--|-------------------------------------|-----------------|
|---------------------------|--|-------------------------------------|-----------------|

|                                  |                             |           |       |
|----------------------------------|-----------------------------|-----------|-------|
| <b>v(C=O)<br/>urethane amide</b> | <b>Free</b>                 | I(1719)   | 11.91 |
|                                  | <b>H-bonded(ordered)</b>    | II(1703)  | 19.41 |
| <b>v(C=O)<br/>urea amide</b>     | <b>Free</b>                 | III(1685) | 19.08 |
|                                  | <b>H-bonded(disordered)</b> | IV(1654)  | 32.80 |
|                                  | <b>H-bonded(ordered)</b>    | V(1634)   | 13.11 |
| <b>v(C=O)<br/>amide</b>          | <b>H-bonded(ordered)</b>    | VI(1622)  | 3.69  |
| <b>Total degree of H-bonded</b>  |                             |           | 69.01 |

The toughness and Young's modulus of the elastomer series in Figure 2d are summarized in Table S9. Young's modulus was obtained by linear fitting of the elastic deformation region in the stress-strain curves of the elastomers.

Table S9. Toughness and Young's Modulus of PUU and PTUU Elastomers

| <b>Sample</b>             | <b>Toughness (MJ m<sup>-3</sup>)</b> | <b>Young's modulus (MPa)</b> |
|---------------------------|--------------------------------------|------------------------------|
| <b>PUU-I<sub>9</sub>D</b> | 206.55                               | 8.22                         |
| <b>PUU-I<sub>2</sub>D</b> | 251.10                               | 6.42                         |
| <b>PUU-ID</b>             | 188.65                               | 4.99                         |
| <b>PUU-ID<sub>2</sub></b> | 163.73                               | 4.85                         |
| <b>PUU-ID<sub>9</sub></b> | 107.96                               | 3.80                         |
| <b>PTUU-C<sub>1</sub></b> | 270.10                               | 6.98                         |
| <b>PTUU-C<sub>2</sub></b> | 286.99                               | 7.34                         |
| <b>PTUU-C<sub>3</sub></b> | 226.21                               | 6.77                         |

Cyclic Tensile Test Ten successive load-unload cycles at 50 %, 100 % and 300 % strain are

shown in Fig. S5.

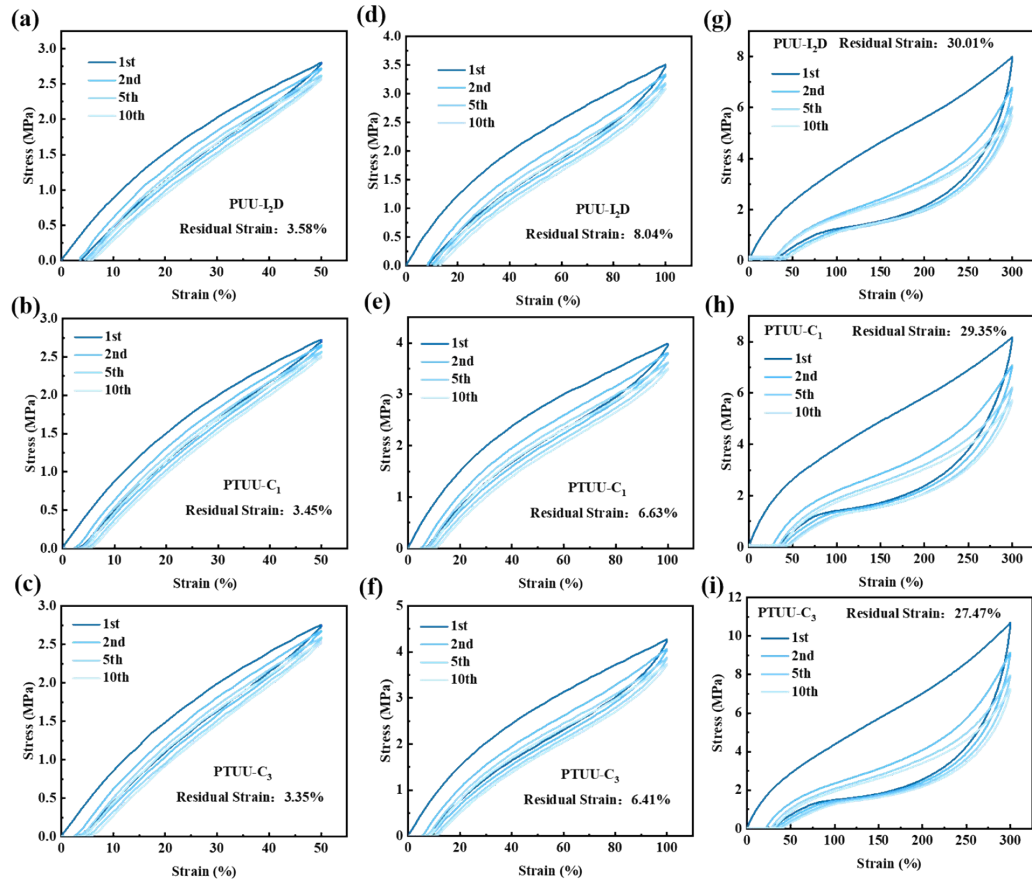

Figure S5. Continuous cyclic tensile curves of (a) PUU-I<sub>2</sub>D, (b) PTUU-C<sub>1</sub>, and (c) PTUU-C<sub>3</sub> at 50% strain; Continuous cyclic tensile curves of (d) PUU-I<sub>2</sub>D, (e) PTUU-C<sub>1</sub> and (f) PTUU-C<sub>3</sub> at 100% strain; Continuous cyclic tensile curves of (g) PUU-I<sub>2</sub>D, (h) PTUU-C<sub>1</sub> and (i) PTUU-C<sub>3</sub> at 300% strain

Notch Fracture Test Photographs of notched specimens during extension are provided in Fig. S6.

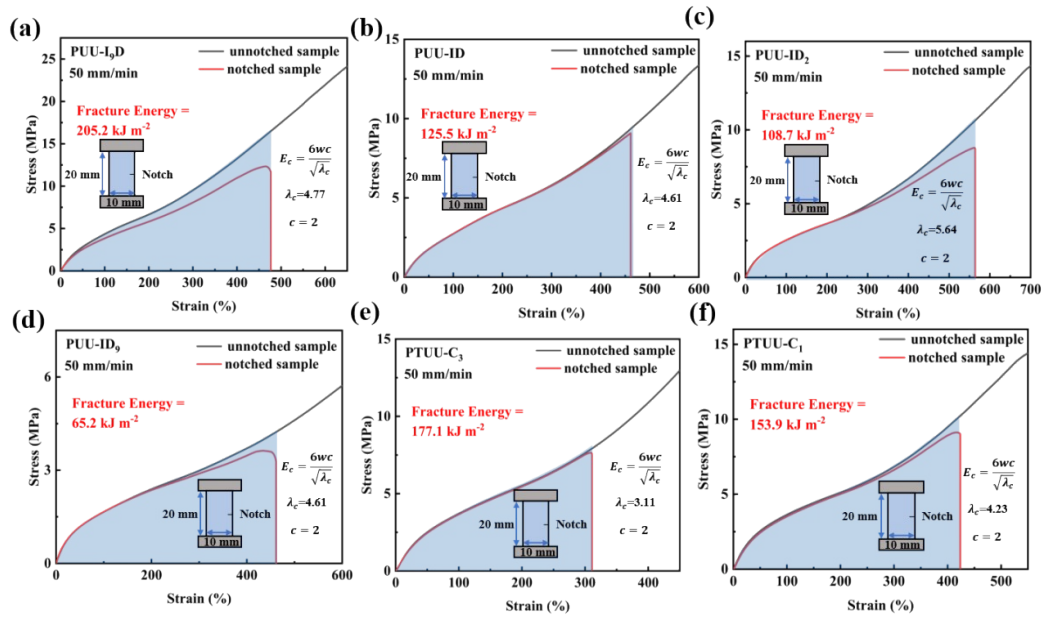

Figure S6. Stress-strain curves of PUU and PTUU elastomers with notch and without notch: (a) PUU-I<sub>9</sub>D, (b) PUU-ID, (c) PUU-ID<sub>2</sub>, (d) PUU-ID<sub>9</sub>, (e) PTUU-C<sub>1</sub> and (f) PTUU-C<sub>2</sub>

The DMT modulus distribution curves of PUU and PTUU-C<sub>2</sub> are shown in Fig. S7.

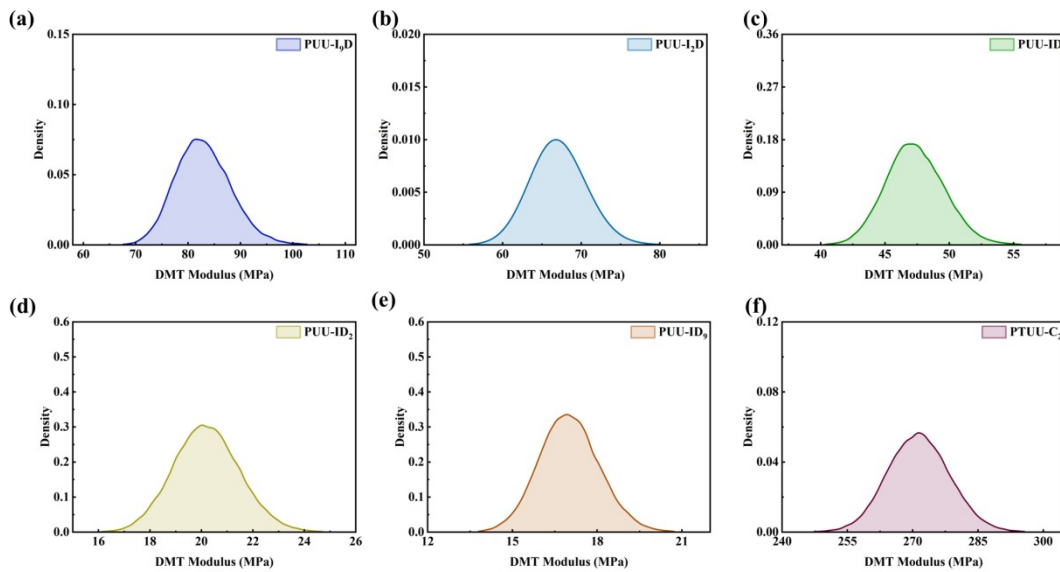

Figure S7. DMT Modulus statistic curve of (a) PUU-I<sub>9</sub>D, (b) PUU-I<sub>2</sub>D, (c) PUU-ID, (d) PUU-ID<sub>2</sub>, (e) PUU-ID<sub>9</sub> and (f) PTUU-C<sub>2</sub>

Water Absorption Water-uptake curves recorded over 168 h are displayed in Fig. S8.

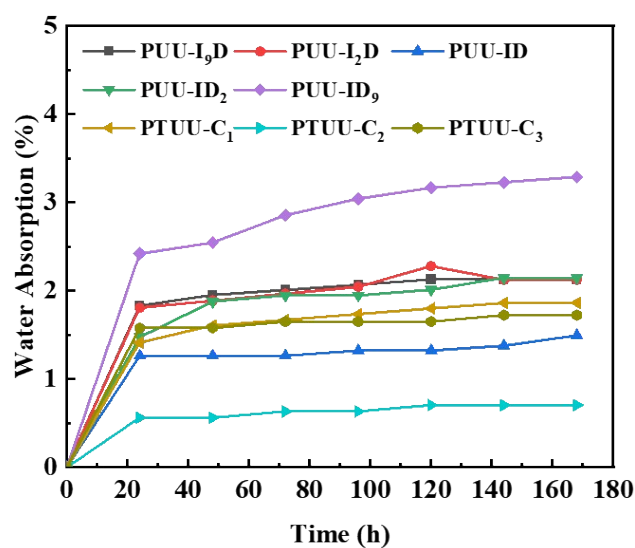

Figure S8. Water absorption of PUU and PTUU elastomers

Periodicity calculation results of hard segment microdomains are shown in Table S10.

Table S10. Hard segment periodicity of PUU-I<sub>9</sub>D, PUU-I<sub>2</sub>D, PUU-ID and PTUU-C<sub>2</sub>

| Sample               | Periodicity(d)/nm |
|----------------------|-------------------|
| PUU-I <sub>9</sub> D | 9.99              |
| PUU-I <sub>2</sub> D | 9.47              |
| PUU-ID               | 9.47              |
| PTUU--C <sub>2</sub> | 10.39             |

Detailed data of the thermogravimetric analysis are recorded in Table S11.

Table S11. Thermal decomposition temperature of PUU and PTUU elastomers

| Sample               | Decomposition Temperature(T <sub>5</sub> )/°C |
|----------------------|-----------------------------------------------|
| PUU-I <sub>9</sub> D | 315.0                                         |
| PUU-I <sub>2</sub> D | 315.2                                         |
| PUU-ID               | 311.5                                         |
| PUU-ID <sub>2</sub>  | 305.0                                         |
| PUU-ID <sub>9</sub>  | 305.5                                         |
| PTUU-C <sub>1</sub>  | 296.7                                         |
| PTUU-C <sub>2</sub>  | 305.1                                         |
| PTUU-C <sub>3</sub>  | 304.6                                         |

Optical Properties Transmittance, haze and refractive-index data are collected in Fig. S9 and Tables S12 and S13.

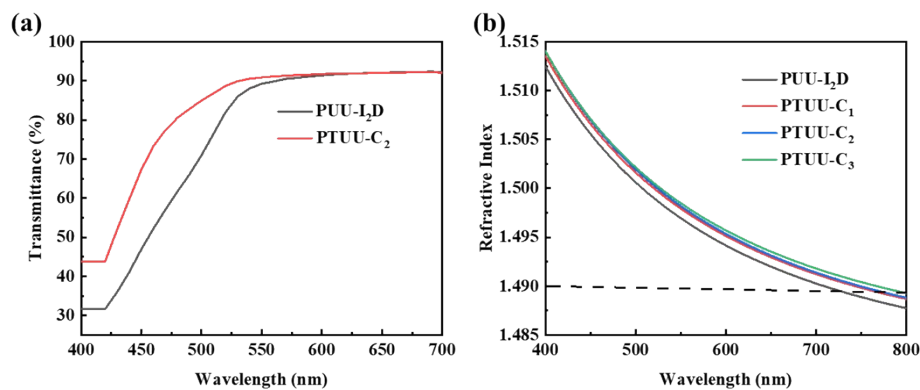

Figure S9. (a) Transmittance of PUU-I<sub>2</sub>D and PTUU-C<sub>2</sub> at wavelength from 400 ~ 700 nm; (b) Curve of refractive index of PUU-I<sub>2</sub>D and PTUU with wavelength

Table S12. Average transmittance and average haze of PUU-I<sub>2</sub>D and PTUU-C<sub>2</sub>

| Sample               | Average transmittance (%) | Average haze (%) |
|----------------------|---------------------------|------------------|
| PUU-I <sub>2</sub> D | 86.04                     | 1.77             |
| PTUU-C <sub>2</sub>  | 89.69                     | 1.23             |

Table S13. Refractive index of PUU-I<sub>2</sub>D and PTUU elastomers at three different wavelengths

| Sample               | 454.7nm | 636.85nm | 786.2nm |
|----------------------|---------|----------|---------|
| PUU-I <sub>2</sub> D | 1.5051  | 1.4923   | 1.4882  |
| PTUU-C <sub>1</sub>  | 1.5061  | 1.4933   | 1.4891  |
| PTUU-C <sub>2</sub>  | 1.5065  | 1.4934   | 1.4893  |
| PTUU-C <sub>3</sub>  | 1.5066  | 1.494    | 1.4896  |

Chemical Recycling <sup>1</sup>H NMR and FTIR spectra of the recycled thiol-terminated polymer are given in Fig. S10.

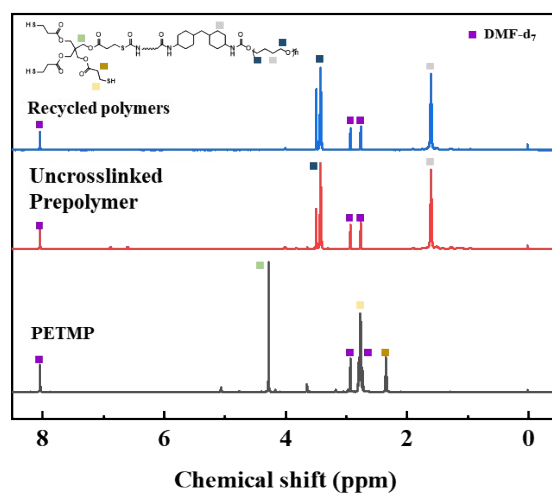

Figure S10.  $^1\text{H}$  NMR spectrum of PETMP, pre-crosslinking(PUU-I<sub>2</sub>D) and recycled polymers

### Testing Methods (Detailed)

Fourier Transform Infrared (FTIR) Spectroscopy FTIR spectra were recorded on a Bruker VERTEX 70v spectrometer at room temperature. Samples were dissolved in DMAc and drop-cast onto KBr pellets. After drying under reduced pressure, the pellets were measured in transmission mode. Spectra were collected from 4000 to 500  $\text{cm}^{-1}$  with a resolution of 2  $\text{cm}^{-1}$  and 32 scans.

Tensile Testing Uniaxial tensile tests were performed on an Instron 5966 universal testing machine at 25 °C. Dumb-bell specimens (effective gauge 15 mm  $\times$  2 mm  $\times$  1 mm) were cut from solvent-cast films and stretched at 50 mm  $\text{min}^{-1}$  until fracture. Tensile strength, elongation at break and toughness (integral under the stress–strain curve) were averaged over five specimens.

Notch Fracture Energy Single-edge-notched samples (20 mm  $\times$  10 mm  $\times$  1 mm, notch depth 2 mm) were stretched at 50 mm  $\text{min}^{-1}$ . The fracture energy ( $E_c$ ) was calculated using the Greensmith equation:  $E_c = 6\omega_c / \sqrt{\lambda c}$ , where  $\omega$  is the strain-energy density of the un-notched sample at the elongation of fracture ( $\lambda c$ ) of the notched specimen.

Dynamic Mechanical Analysis (DMA) DMA was carried out on a TA Q800 analyser in

tension mode. Specimens (10 mm × 6 mm × 1 mm) were heated from −100 to 100 °C at 3 °C min<sup>−1</sup> under 1 Hz frequency. Storage modulus ( $E'$ ) and loss factor ( $\tan \delta$ ) were recorded.

Self-Healing Test Film strips were cut through  $\geq 80$  % of their thickness with a scalpel. The two halves were immediately re-contacted and placed in a convection oven at 100 °C for 48 h without external pressure. Healing efficiency  $\eta = (\sigma_{\text{healed}} / \sigma_{\text{original}}) \times 100$  % was determined from tensile tests (five repeats).

Atomic Force Microscopy (AFM) Surface morphology and modulus were mapped on a Bruker Icon microscope in PeakForce QNM mode. Scans ( $5 \times 5 \mu\text{m}^2$ ) were acquired at 0.5 Hz with a silicon tip (spring constant  $\approx 0.4 \text{ N m}^{-1}$ ). DMT modulus histograms were extracted using NanoScope Analysis.

Small-Angle X-ray Scattering (SAXS) SAXS patterns were collected on a Xenocs Xeuss 2.0 system (Cu  $K\alpha$ ,  $\lambda = 1.54189 \text{ \AA}$ , sample-to-detector 1188 mm). Films were exposed for 300 s and azimuthally integrated to obtain one-dimensional profiles. Hard-segment periodicity  $d$  was calculated from the peak maximum  $q^*$  via  $d = 2\pi / q^*$ .

X-ray Diffraction (XRD) Wide-angle patterns were recorded on a PANalytical X'Pert Pro MRD diffractometer (Cu  $K\alpha$ ) from 5 to 60°  $2\theta$  with a 0.033° step and 10 s per step.

UV–Vis Spectroscopy Absorption spectra were measured on a Shimadzu UV-2600i spectrophotometer. Thin films spin-coated on quartz slides were scanned from 200 to 800 nm at 1 nm intervals.

Fluorescence Spectroscopy Photoluminescence was recorded on a HORIBA FluoroMax Plus ( $\lambda_{\text{ex}} 254 \text{ nm}$ , slits 5 nm) or an Edinburgh FLS1000 ( $\lambda_{\text{ex}} 350 \text{ nm}$ , slits 4 nm). Emission was collected from 274 to 540 nm or 370 to 680 nm, respectively, with 1 nm steps.

Thermogravimetric Analysis (TGA) TGA was performed on a Netzsch TG209F3 under

nitrogen (50 mL min<sup>-1</sup>). Samples (3–5 mg) were heated from 35 to 600 °C at 10 °C min<sup>-1</sup>. The temperature at 5 % mass loss (T<sub>5</sub>) was used as the decomposition onset.

Cyclic Tensile Test Load–unload cycles (10 consecutive) were performed at 50 mm min<sup>-1</sup> with maximum strains of 50 %, 100 % or 300 %. After the 10th cycle, samples were rested for 10 min and then pulled again to evaluate recovery.

Stress Relaxation A TA Q800 analyser applied 1 % tensile strain at 100 °C. The decay of stress was recorded for 60 min and normalised by the initial stress  $\sigma_0$ .

Water Absorption Rectangular films (20 × 10 × 1 mm) were immersed in de-ionised water at 25 °C. Mass was recorded every 24 h for 168 h after gently wiping off surface water. Water uptake (%) =  $(m_t - m_0) / m_0 \times 100$ . After immersion, samples were dried at 80 °C for 24 h and re-tested in tension.

Swelling and Gel Content ~0.5 g films were immersed in acetone at 25 °C for 72 h to reach equilibrium. After blotting, the swollen mass  $m_1$  and dried mass  $m_2$  (80 °C, 2 h) were recorded.

$$\text{Swelling ratio } S = (m_1 - m_0) / m_0 \times 100 \%$$

$$\text{Gel content } G = m_2 / m_0 \times 100 \%$$

Thermal-Oxidative Aging Following GB/T 3512-2014, films were aged in a forced-air oven at 110 °C for 168 h. Tensile properties before and after aging were compared.

Refractive Index A Metricon 2010/M prism coupler was used at 454.7, 636.85 and 786.2 nm. Films (15 × 15 × 1 mm) were pressed against the prism; the critical angle was converted to refractive index using the instrument software.

<sup>1</sup>H NMR Spectroscopy Spectra were acquired on a Bruker AVANCE III HD 600 MHz spectrometer at 25 °C. Approximately 10 mg of polymer was dissolved in 0.6 mL DMF-d<sub>7</sub>. Sixteen scans were accumulated with a 5 mm PABBO probe.
